# Supplementary material for: Differential Effect of Non-Thermal Plasma RONS on Two Human Leukemic Cell Populations
Source: MDPI journal article supplement (doi:10.3390/cancers13102437), 2021-05-18
Supplement: s1 [file s1]

# Supplementary Materials: Differential Effect of Non-Thermal Plasma RONS on Two Human Leukemic Cell Populations

Hager Mohamed, Eric Gebiski, Rufranshell Reyes, Samuel Beane, Brian Wigdahl, Fred C. Krebs, Katharina Stapelmann and Vandana Miller

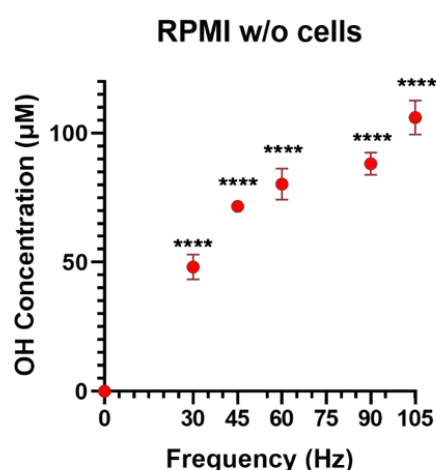

**Figure S1.** NTP-exposure of RPMI results in a frequency-dependent increase in OH immediately (T0) following exposure. Data are presented as mean  $\pm$  SD from one experiment ( $n = 3$ ). Significance was calculated using an unpaired Student's t-test and determined with respect to the mock-exposed (0 Hz) control (\*\*\*\*  $p < 0.0001$ ).

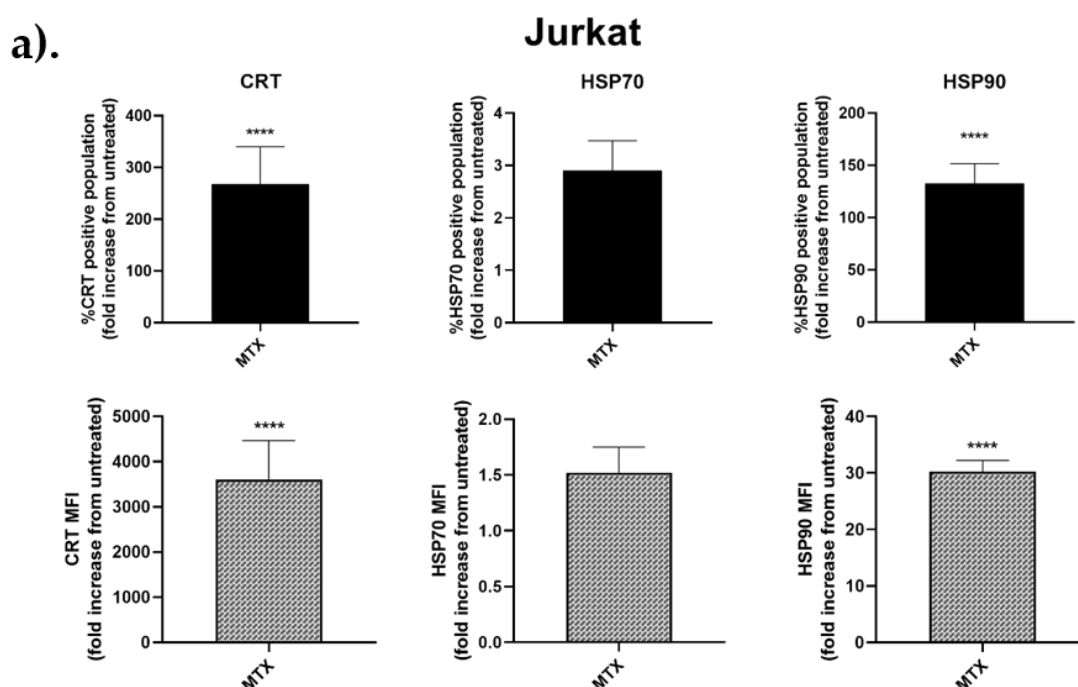

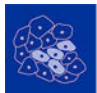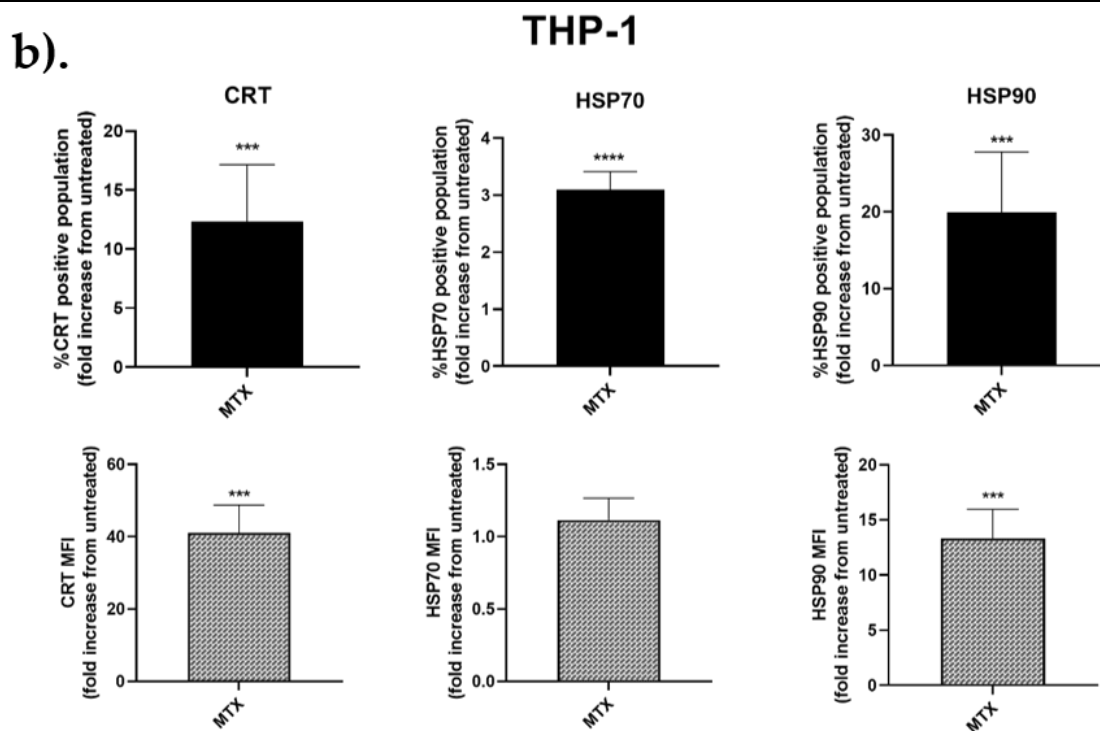

**Figure S2.** Treatment of Jurkat or THP-1 cells with MTX results in robust increase in the display of pro-phagocytic markers. Display of CRT, HSP70, and/or HSP90 is increased 24 h following treatment with the chemotherapeutic drug mitoxantrone (MTX) of (a) Jurkat and (b) THP-1 cells. Data are presented as mean  $\pm$  SEM. Significance was calculated using a Kruskal-Wallis test with Dunnett's post-hoc test (\*\*  $p < 0.001$ , \*\*\*\*  $p < 0.0001$ ).
